# Supplementary material
Source: ML conference proceedings conference paper supplement (https://openreview.net/forum?id=FkTEc3XEL6)
Supplement: supplementary_material [file srt_data_domains.pdf › srt_data_domains.pdf]

| Original domain                     | Merged domain |
|-------------------------------------|---------------|
| Immune infiltrate                   | Immune        |
| Adipose tissue<br>Connective tissue | Stroma        |
| Breast glands                       | Normal        |
| Cancer in situ<br>Invasive cancer   | Tumor         |
| Not annotated                       | Not annotated |

Table 1: BC\_HER2+\_10x

| Original domain                                                                     | Merged domain   |
|-------------------------------------------------------------------------------------|-----------------|
| Lymphocytes                                                                         | Immune          |
| High Tumor-Infiltrating Lymphocytes (TILs) stroma<br>Lymphoid stroma                | Stroma + immune |
| Normal epithelium                                                                   | Normal          |
| Adipose tissue<br>Fibrosis<br>Fibrous stroma                                        | Stroma          |
| In situ carcinoma<br>Tumor cells                                                    | Tumor           |
| Tumor stroma                                                                        | Tumor + stroma  |
| Artifacts<br>Endothelial<br>Hyperplasia<br>Necrosis<br>Peripheral nerve<br>Vascular | Not included    |
| Not annotated                                                                       | Not annotated   |

Table 2: BC\_HP\_10x

| Original domain                                                                                                                                                                                                                        | Merged domain           |
|----------------------------------------------------------------------------------------------------------------------------------------------------------------------------------------------------------------------------------------|-------------------------|
| Lymphocytes                                                                                                                                                                                                                            | Immune                  |
| Invasive cancer + lymphocytes                                                                                                                                                                                                          | Tumor + immune          |
| Invasive cancer + stroma + lymphocytes                                                                                                                                                                                                 | Tumor + stroma + immune |
| Adipose tissue<br>Stroma<br>Stroma + adipose tissue                                                                                                                                                                                    | Stroma                  |
| Ductal Carcinoma In Situ (DCIS)<br>Invasive cancer                                                                                                                                                                                     | Tumor                   |
| Invasive cancer + stroma                                                                                                                                                                                                               | Tumor + stroma          |
| Artifact<br>Cancer trapped in lymphocyte aggregation<br>Invasive cancer + adipose tissue + lymphocytes<br>Normal duct<br>Normal glands + lymphocytes<br>Normal + stroma + lymphocytes<br>Necrosis<br>Tertiary Lymphoid Structure (TLS) | Not included            |
| Not annotated                                                                                                                                                                                                                          | Not annotated           |

Table 3: BC\_NP\_10x

| Original domain                                                                                      | Merged domain   |
|------------------------------------------------------------------------------------------------------|-----------------|
| Lymphocyte<br>Lymphoid nodule                                                                        | Immune          |
| High Tumor-Infiltrating Lymphocyte (TIL) stroma<br>Low TIL stroma                                    | Stroma + immune |
| Acellular stroma<br>Fat tissue<br>Stroma cell                                                        | Stroma          |
| Tumor                                                                                                | Tumor           |
| Heterologous elements<br>In situ<br>Lactiferous duct<br>Necrosis<br>Nerve<br>Tumor region<br>Vessels | Not included    |

Table 4: BC\_TNBC\_ST

| Original domain                                                                                                                                                                                                                                                                                   | Merged domain           |
|---------------------------------------------------------------------------------------------------------------------------------------------------------------------------------------------------------------------------------------------------------------------------------------------------|-------------------------|
| Connective tissue 2 fibroblastic Immune Cell (IC) low<br>Connective tissue 3 fibroblastic IC med<br>IC aggregate connective tissue<br>Stroma desmoplastic IC low<br>Stroma desmoplastic IC med to high<br>Stroma fibroblastic IC high<br>Stroma fibroblastic IC low<br>Stroma fibroblastic IC med | Stroma + immune         |
| Tumor & stroma IC low<br>Tumor & stroma IC med to high                                                                                                                                                                                                                                            | Tumor + stroma + immune |
| Epithelium & lam propria<br>Epithelium & submucosa<br>Lamina propria<br>Non neo epithelium<br>Submucosa                                                                                                                                                                                           | Normal                  |
| Connective tissue 1 edema                                                                                                                                                                                                                                                                         | Stroma                  |
| Tumor                                                                                                                                                                                                                                                                                             | Tumor                   |
| Tumor & stroma                                                                                                                                                                                                                                                                                    | Tumor + stroma          |
| Connective tissue 4 muscularis IC low<br>Glandular tissue<br>IC aggregate muscularis or stroma<br>IC aggregate submucosa<br>Muscularis IC med to high<br>Squamous epithelium                                                                                                                      | Not included            |
| Not annotated                                                                                                                                                                                                                                                                                     | Not annotated           |

Table 5: CRC\_CMS\_10x

| Original domain                                        | Merged domain |
|--------------------------------------------------------|---------------|
| Infiltrating cell<br>Tertiary Lymphoid Structure (TLS) | Immune        |
| Normal cell                                            | Normal        |
| Tumor cell                                             | Tumor         |
| Not annotated                                          | Not annotated |

Table 6: KC\_TLS\_10x

| Original domain                                        | Merged domain |
|--------------------------------------------------------|---------------|
| Infiltrating cell<br>Tertiary Lymphoid Structure (TLS) | Immune        |
| Normal cell                                            | Normal        |
| Tumor cell                                             | Tumor         |
| Lymph node                                             | Not included  |
| Not annotated                                          | Not annotated |

Table 7: LC\_TLS\_10x
